# Supplementary material for: Regulatory mechanisms and metabolic changes of miRNA during leaf color change in the bud mutation branches of Acer pictum subsp. mono
Source: Front Plant Sci. 2023 Jan 12;13:1047452. doi: 10.3389/fpls.2022.1047452 (PMC9879609; doi:10.3389/fpls.2022.1047452)
Supplement: Supplementary file 1 [file Table_1.xlsx]

## Sheet: Sheet1
Table S1. known miRNA family classification
Families	Members	Families	Members	Families	Members
MIR 156	53	MIR 477	13	MIR400	2
MIR 396	46	MIR 535	13	MIR3630	2
MIR 166	45	MIR 828	12	MIR827_5	2
MIR 159	44	MIR2118	9	MIR408_2	2
MIR171_1	42	MIR 319	8	MIR 3522	2
MIR160	41	MIR 529	6	MIR 1082	1
MIR167_1	37	MIR167_2	6	MIR 5302	1
MIR 172	37	MIR 444	6	MIR845_2	1
MIR 164	35	MIR 827	5	MIR 6149	1
MIR 390	33	MIR 437	5	MIR 7540	1
MIR 399	31	MIR 2275	5	MIR 1862	1
MIR 395	31	MIR162_2	4	MIR9560	1
MIR168	31	MIR827_2	3	MIR 2673	1
MIR 408	31	MIR 858	3	MIR 5998	1
MIR 398	31	MIR827_3	3	MIR169_3	1
MIR 397	29	MIR169_4	2	MIR 481	1
MIR169_1	28	MIR 821	2	MIR 812	1
MIR162_1	27	MIR 414	2	MIR845_3	1
MIR169_2	27	MIR398_2	2	MIR396_2	1
MIR 394	27	MIR845_1	2	MIR 8553	1
MIR 393	26	MIR862_2	2	MIR 1863	1
MIR 482	24	MIR 1536	2	MIR 167	1
MIR171_2	18	MIR4414	2	MIR 5169	1
MIR 403	17	MIR 1511	2	MIR8005	1
MIR 530	15	MIR 2950	2	MIR4349	1
MIR 2111	14	MIR6025	2
