# Supplementary material for: Regulatory mechanisms and metabolic changes of miRNA during leaf color change in the bud mutation branches of Acer pictum subsp. mono
Source: Front Plant Sci. 2023 Jan 12;13:1047452. doi: 10.3389/fpls.2022.1047452 (PMC9879609; doi:10.3389/fpls.2022.1047452)
Supplement: Supplementary file 2 [file Table_2.xlsx]

## Sheet: Sheet1
Table S2.Key gene primer sequence and Tm value
Gene name	Primer	Tm
UFGT	ATGCCACCGCCTCCACAATTA	60
	TACCAGACCCGACCTTCT
UPG2	GTTCAAAGAGTGGGGCTTTG	60
	TTAATTGGATCCGGAGCTTG
SUS	TGGGGCAATACAGCACAGAG	60
	GAGATGCCACCAAGTTCCCA
18S	AACCCAGATGACACCGTTCT	60
	TGAAACCCAGATTCGGCTAC
