# Supplementary material for: Regulatory mechanisms and metabolic changes of miRNA during leaf color change in the bud mutation branches of Acer pictum subsp. mono
Source: Front Plant Sci. 2023 Jan 12;13:1047452. doi: 10.3389/fpls.2022.1047452 (PMC9879609; doi:10.3389/fpls.2022.1047452)
Supplement: Supplementary file 3 [file Table_3.xlsx]

## Sheet: Sheet1
Table S3.Key miRNA Mature sequence and Tm value
Gene name	Primer	Tm
MiR160b	TGCCTGGCTCCCTGTATGCC	62
MiR396e	TTCCACAGGCTTTCTTGAACT	62
MiR6300	GTCGTTGTAGTATAGTGG	60
U6	CTCGCTTCGGCAGCACA	60
	AACGCTTCACGAATTTGCGT
